# Supplementary material for: ALL-tRNAseq enables robust tRNA profiling in tissue samples
Source: PubMed Central journal article supplement — Genes Dev. 2023 Mar 1;37(5-6):243–57. doi: 10.1101/gad.350233.122 (PMC10111867; doi:10.1101/gad.350233.122), 2023-03-01
Supplement: supp_gad.350233.122_Supplemental_Table1.pdf [file supp_gad.350233.122_Supplemental_Table1.pdf]

**Table S1.** Primers for qPCR and library construction, oligonucleotides and probes for Northern Blot

|                              |                                                                                             |
|------------------------------|---------------------------------------------------------------------------------------------|
| GAPDH-FW primer Gingold      | 5'-AATGAAGGGGTCATTGATGG-3'                                                                  |
| GAPDH-RV primer Gingold      | 5'-AAGGTGAAGGTCGGAGTCAA-3'                                                                  |
| OCT4-FW primer Gingold       | 5'-GGTTCTCGATACTGGTTCGC-3'                                                                  |
| OCT4-RV primer Gingold       | 5'-GTGGAGGAAGCTGACAACAA-3'                                                                  |
| NANOG-FW primer Gingold      | 5'-ATGGAGGAGGGAAGAGGAGA-3'                                                                  |
| NANOG-RV primer Gingold      | 5'-GATTTGTGGCCTGAAGAAA-3'                                                                   |
| MEIS2-FW primer Gingold      | 5'-CCTGTGTCTTGCCTAACTG-3'                                                                   |
| MEIS2-RV primer Gingold      | 5'-GGCATTTCCTCCAAAGTAGC-3'                                                                  |
| GATA6-FW primer Gingold      | 5'-ACTTGAGCTCGCTGTTCTCG-3'                                                                  |
| GATA6-RV primer Gingold      | 5'-CAGCAAAAATACTTCCCCCA-3'                                                                  |
| degenerate 3' SR Adapter -4N | 5'/5Phos/(N:25252525)(N)(N)(N)(N)AGATCGGAAGAGCACACGTCT/3SpC3                                |
| degenerate 5' SR Adaptor -4N | 5'-rGrUrUrCrArGrArGrUrUrCrUrArCrArGrUrCrCrGrArCrGrArUrCr(N:25252525)r(N)r(N)r(N)r(N)-3'     |
| 23nt-RNA marker-FAM          | 5'-/6-FAM/rUrUrUrArCrGrCrGrArArUrArGrUrUrArArArCrCrUrG/ddC-3'                               |
| 39nt-RNA marker-FAM          | 5'-/6-FAM/rUrUrArGrArArGrArCrGrArGrUrCrArCrArUrGrArCrCrArArUrArGrCrGrArUrArArCrUrGrA/ddC-3' |
| NEBNext SR RT Primer         | 5'-AGACGTGTGCTCTTCCGATCT-3'                                                                 |
| SR Primer for Illumina (RP1) | 5'-AATGATACGGCGACCACCGAGATCTACACGTTTCAGAGTTCTACAGTCCGA-3'                                   |
| RPI01 PCR index primer       | 5'-CAAGCAGAAGACGGCATAACGAGAT <u>CGTGAT</u> GTGACTGGAGTTCAGACGTGTGCTCTTCCGATC*T-3'           |
| RPI02 PCR index primer       | 5'-CAAGCAGAAGACGGCATAACGAGAT <u>ACATCG</u> GTTGACTGGAGTTCAGACGTGTGCTCTTCCGATC*T-3'          |
| RPI03 PCR index primer       | 5'-CAAGCAGAAGACGGCATAACGAGAT <u>GCCTAAG</u> TGACTGGAGTTCAGACGTGTGCTCTTCCGATC*T-3'           |
| RPI04 PCR index primer       | 5'-CAAGCAGAAGACGGCATAACGAGAT <u>TGGTCA</u> GTTGACTGGAGTTCAGACGTGTGCTCTTCCGATC*T-3'          |
| RPI05 PCR index primer       | 5'-CAAGCAGAAGACGGCATAACGAGAT <u>CACTGT</u> GTTGACTGGAGTTCAGACGTGTGCTCTTCCGATC*T-3'          |
| RPI06 PCR index primer       | 5'-CAAGCAGAAGACGGCATAACGAGAT <u>ATTGGC</u> GTTGACTGGAGTTCAGACGTGTGCTCTTCCGATC*T-3'          |
| RPI08 PCR index primer       | 5'-CAAGCAGAAGACGGCATAACGAGAT <u>CAAGT</u> GTTGACTGGAGTTCAGACGTGTGCTCTTCCGATC*T-3'           |
| RPI10 PCR index primer       | 5'-CAAGCAGAAGACGGCATAACGAGAT <u>AAGCTA</u> GTTGACTGGAGTTCAGACGTGTGCTCTTCCGATC*T-3'          |
| RPI11 PCR index primer       | 5'-CAAGCAGAAGACGGCATAACGAGAT <u>GTAGCC</u> GTTGACTGGAGTTCAGACGTGTGCTCTTCCGATC*T-3'          |
| RPI12 PCR index primer       | 5'-CAAGCAGAAGACGGCATAACGAGAT <u>TACAAG</u> GTTGACTGGAGTTCAGACGTGTGCTCTTCCGATC*T-3'          |
| RPI13 PCR index primer       | 5'-CAAGCAGAAGACGGCATAACGAGAT <u>TGACT</u> GTTGACTGGAGTTCAGACGTGTGCTCTTCCGATC*T-3'           |
| RPI14 PCR index primer       | 5'-CAAGCAGAAGACGGCATAACGAGAT <u>GGAAGT</u> GTTGACTGGAGTTCAGACGTGTGCTCTTCCGATC*T-3'          |
| RPI15 PCR index primer       | 5'-CAAGCAGAAGACGGCATAACGAGAT <u>TGACAT</u> GTTGACTGGAGTTCAGACGTGTGCTCTTCCGATC*T-3'          |
| RPI16 PCR index primer       | 5'-CAAGCAGAAGACGGCATAACGAGAT <u>GGACGG</u> GTTGACTGGAGTTCAGACGTGTGCTCTTCCGATC*T-3'          |
| RPI17 PCR index primer       | 5'-CAAGCAGAAGACGGCATAACGAGAT <u>CTCTAC</u> GTTGACTGGAGTTCAGACGTGTGCTCTTCCGATC*T-3'          |
| RPI18 PCR index primer       | 5'-CAAGCAGAAGACGGCATAACGAGAT <u>GCGGAC</u> GTTGACTGGAGTTCAGACGTGTGCTCTTCCGATC*T-3'          |
| RPI19 PCR index primer       | 5'-CAAGCAGAAGACGGCATAACGAGAT <u>TTTACG</u> TGTTGACTGGAGTTCAGACGTGTGCTCTTCCGATC*T-3'         |
| RPI22 PCR index primer       | 5'-CAAGCAGAAGACGGCATAACGAGAT <u>CGTACG</u> GTTGACTGGAGTTCAGACGTGTGCTCTTCCGATC*T-3'          |
| RPI23 PCR index primer       | 5'-CAAGCAGAAGACGGCATAACGAGAT <u>CCACTC</u> GTTGACTGGAGTTCAGACGTGTGCTCTTCCGATC*T-3'          |
| RPI24 PCR index primer       | 5'-CAAGCAGAAGACGGCATAACGAGAT <u>GCTACC</u> GTTGACTGGAGTTCAGACGTGTGCTCTTCCGATC*T-3'          |
| RPI25 PCR index primer       | 5'-CAAGCAGAAGACGGCATAACGAGAT <u>ATCAGT</u> GTTGACTGGAGTTCAGACGTGTGCTCTTCCGATC*T-3'          |
| RPI26 PCR index primer       | 5'-CAAGCAGAAGACGGCATAACGAGAT <u>GCTCAT</u> GTTGACTGGAGTTCAGACGTGTGCTCTTCCGATC*T-3'          |
| RPI27 PCR index primer       | 5'-CAAGCAGAAGACGGCATAACGAGAT <u>AGGAAT</u> GTTGACTGGAGTTCAGACGTGTGCTCTTCCGATC*T-3'          |
| RPI28 PCR index primer       | 5'-CAAGCAGAAGACGGCATAACGAGAT <u>CTTTTG</u> TGTTGACTGGAGTTCAGACGTGTGCTCTTCCGATC*T-3'         |
| RPI29 PCR index primer       | 5'-CAAGCAGAAGACGGCATAACGAGAT <u>TAGTTG</u> TGTTGACTGGAGTTCAGACGTGTGCTCTTCCGATC*T-3'         |
| RPI30 PCR index primer       | 5'-CAAGCAGAAGACGGCATAACGAGAT <u>CCGGTG</u> GTTGACTGGAGTTCAGACGTGTGCTCTTCCGATC*T-3'          |
| RPI31 PCR index primer       | 5'-CAAGCAGAAGACGGCATAACGAGAT <u>ATCGTG</u> GTTGACTGGAGTTCAGACGTGTGCTCTTCCGATC*T-3'          |
| RPI34 PCR index primer       | 5'-CAAGCAGAAGACGGCATAACGAGAT <u>GCCATG</u> GTTGACTGGAGTTCAGACGTGTGCTCTTCCGATC*T-3'          |
| RPI35 PCR index primer       | 5'-CAAGCAGAAGACGGCATAACGAGAT <u>AAAATG</u> TGTTGACTGGAGTTCAGACGTGTGCTCTTCCGATC*T-3'         |
| RPI36 PCR index primer       | 5'-CAAGCAGAAGACGGCATAACGAGAT <u>TGTTGG</u> TGTTGACTGGAGTTCAGACGTGTGCTCTTCCGATC*T-3'         |
| GlyGCC DNA oligo 18nt        | 5'-TGGTGGTTCAGTGGTAGA-3'                                                                    |
| GlyGCC DNA oligo 35nt        | 5'-GCATTGGTGGTTCAGTGGTAGAATTCTCGCTGCC-3'                                                    |
| GlyGCC DNA oligo 74nt        | 5'-GCATTGGTGGTTCAGTGGTAGAATTCTCGCTGCCACGCGGGAGGCCCGGGTTCGATTCGCGCAATGCACCA-3'               |
| 5'GlyGCC-5-1-northern probe  | /5Biosg/TCTACCACTGAACCACCAAT-3'                                                             |
| 5'TrpCCA-northern probe      | /5Biosg/TCAGATGCGCTACCGTTGCGCCA-3'                                                          |
| 3'TyrGTA-northern probe      | /5Biosg/AACTAAGGATCTACAGTCCCTCCGCTCTACCAGCT-3'                                              |
| 3'SeC-TCA-northern probe     | /5Biosg/AAACGCCCCAAATGGAATTGAACCACTCTGTGC-3'                                                |
| 3'HisGTG-northern probe      | /5Biosg/AAATGCCGTACTCGGATTCGAACCGAGGTTGCTG-3'                                               |
| 3'PheGAA-northern probe      | /5Biosg/AAATGCCGAAACCCGGGATCGAACCCAGGGAC-3'                                                 |
| 3'LysCTT-northern probe      | /5Biosg/AAACCAACGTGGGGCTCGAACCCACGACCCT -3'                                                 |
| 5s rRNA-northern probe       | /5Biosg/CCGACCCTGCTTAGCTTCC-3'                                                              |
